# Supplementary material
Source: PubMed Central journal article supplement (PMC3656592)
Supplement: NIHMS459099-supplement-01.pdf [file NIHMS459099-supplement-01.pdf]

Developmental Cell, Volume 24

## Supplemental Information

### Wnt-Dependent Epithelial Transitions

#### Drive Pharyngeal Pouch Formation

Chong Pyo Choe, Andres Collazo, Le A. Trinh, Luyuan Pan, Cecilia B. Moens, and J. Gage Crump

### INVENTORY OF SUPPLEMENTAL INFORMATION

#### SUPPLEMENTAL FIGURES

Figure S1, related to Figure 3. Wnt signaling in pouch, CB cartilage, and neural crest development

Figure S2, related to Figure 3. Specificity of *nkx2.3:Gal4VP16* and GFP-Dvl localization in pouches

Figure S3, related to Figure 4. Alcama localization in Rac-inhibited embryos and quantification of cell shape

Figure S4, related to Figure 5. Requirement of Alcama in endoderm and its role in  $\alpha$ -catenin localization

#### SUPPLEMENTAL EXPERIMENTAL PROCEDURES

#### SUPPLEMENTAL REFERENCES

## SUPPLEMENTAL FIGURES

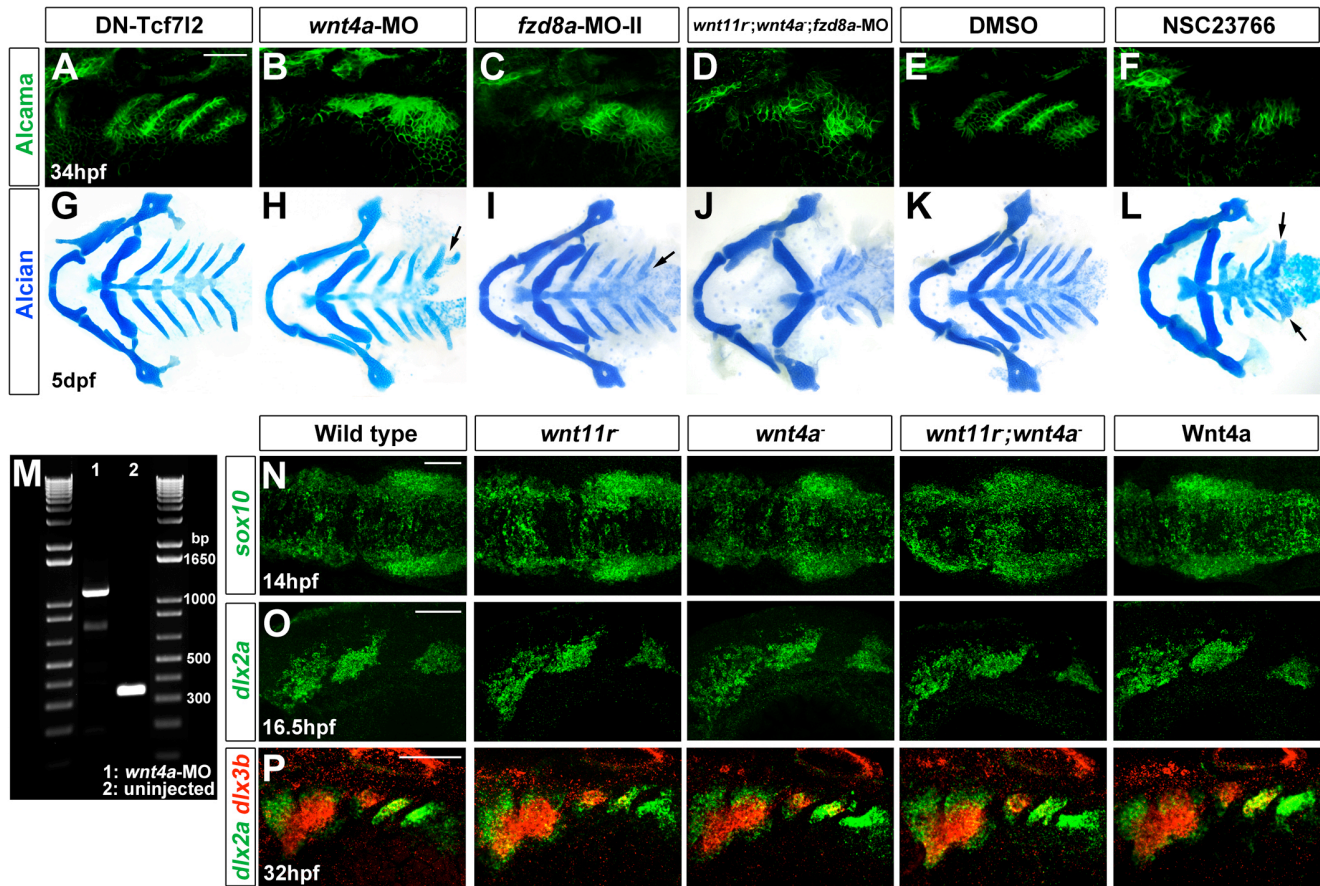

**Figure S1, Wnt signaling in pouch, CB cartilage, and neural crest development, related to Figure 3.**

(A-L) Alcama immunohistochemistry (A-F) and Alcian Blue staining (G-L) show no pouch or CB cartilage defects upon PE-specific inhibition of nuclear- $\beta$ -catenin signaling in *nkx2.3:Gal4VP16; UAS:DN-Tcf712* embryos (A and G) or in control embryos incubated in 6% DMSO from 18-26 hpf (E and K). In contrast, severe pouch and CB defects were observed in *wnt4a*-MO (B and H), *fzd8a*-MO-II (C and I), and *fzd8a*-MO-injected *wnt11r; wnt4a* double mutants (D and J), as well as embryos incubated in 300  $\mu$ M of the Rac inhibitor NSC23766 from 18-26 hpf (F and L). Arrows indicate fused or malformed CBs.

(M) In uninjected control embryos, normal splicing of intron 2 of the *wnt4a* gene generates a 333 bp band after PCR amplification. In contrast, one-cell-stage injection of *wnt4a*-MO at 300  $\mu$ M results in a failure to splice out intron 2, thus resulting in a 1137 bp band (333 bp of exon2/3 and 804 bp of second intron).

(N-P) Fluorescent in situs show normal expression of *sox10* at 14 hpf, *dlx2a* at 16.5 hpf, and *dlx2a* (green) and *dlx3b* (red) at 32 hpf in wild types, mutants, and Wnt4a-misexpression embryos. Wnt4a transgenic embryos (capitalized) were doubly positive for *nkx2.3:Gal4VP16*. The *sox10* in situ shows a dorsal view of early cranial neural crest, and the *dlx2a* and *dlx2a/dlx3b* in situs show lateral views of the developing pharyngeal arches. Anterior is to the left in all images. Scale bars = 40  $\mu$ M.

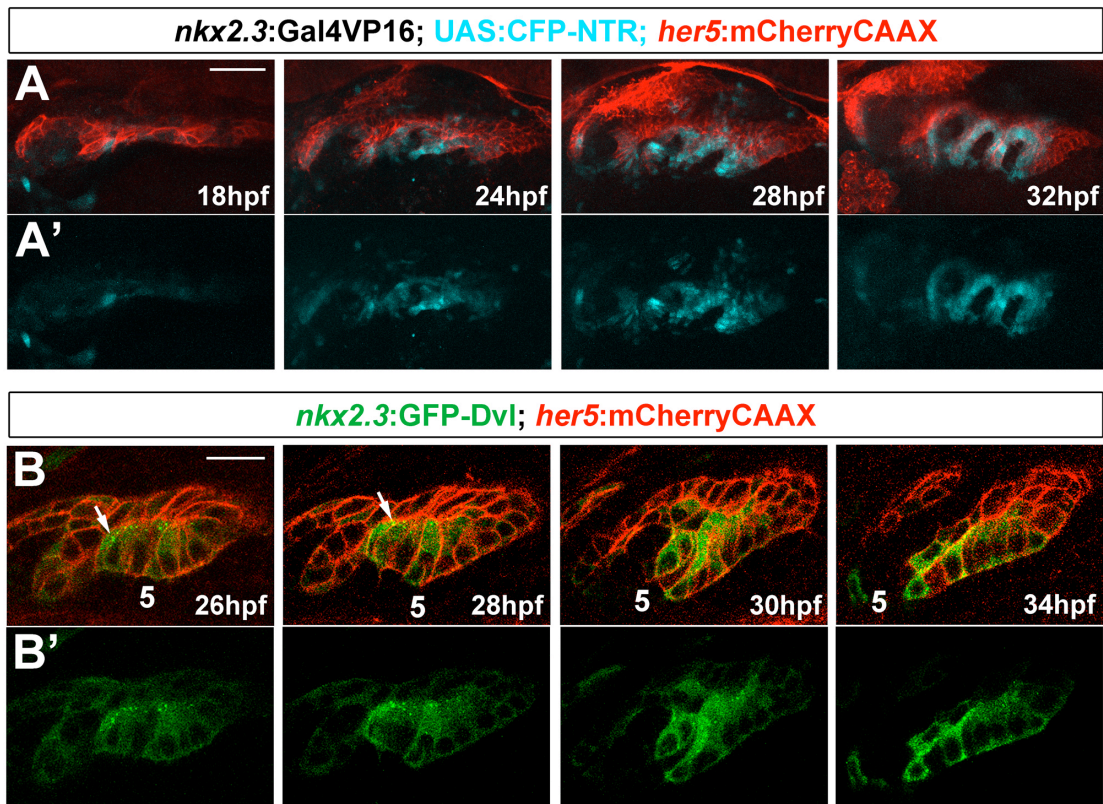

Figure S2, Specificity of *nkx2.3:Gal4VP16* and GFP-Dvl localization in pouches, related to Figure 3.

(A) Time-course of CFP-NTR expression in *nkx2.3:Gal4VP16; UAS:CFP-NTR; her5:mCherryCAAX* transgenic embryos. *nkx2.3:Gal4VP16*-dependent CFP-NTR expression (blue) co-localizes with *her5:mCherryCAAX*-positive pouch-forming endoderm (red) starting at 18 hpf, with expression becoming stronger as pouch development progresses. Views are dorsal-lateral with anterior to the left. Scale bar = 40  $\mu$ M.

(B) Still images from a time-lapse confocal recording of fifth pouch development in *nkx2.3:GFP-Dvl; her5:mCherryCAAX* transgenic embryos (see Movie S5). GFP-Dvl (green) localizes to apical puncta (arrows) during remodeling of the *her5:mCherryCAAX*-positive endoderm (red) to form pouches. Scale bar = 20  $\mu$ M.

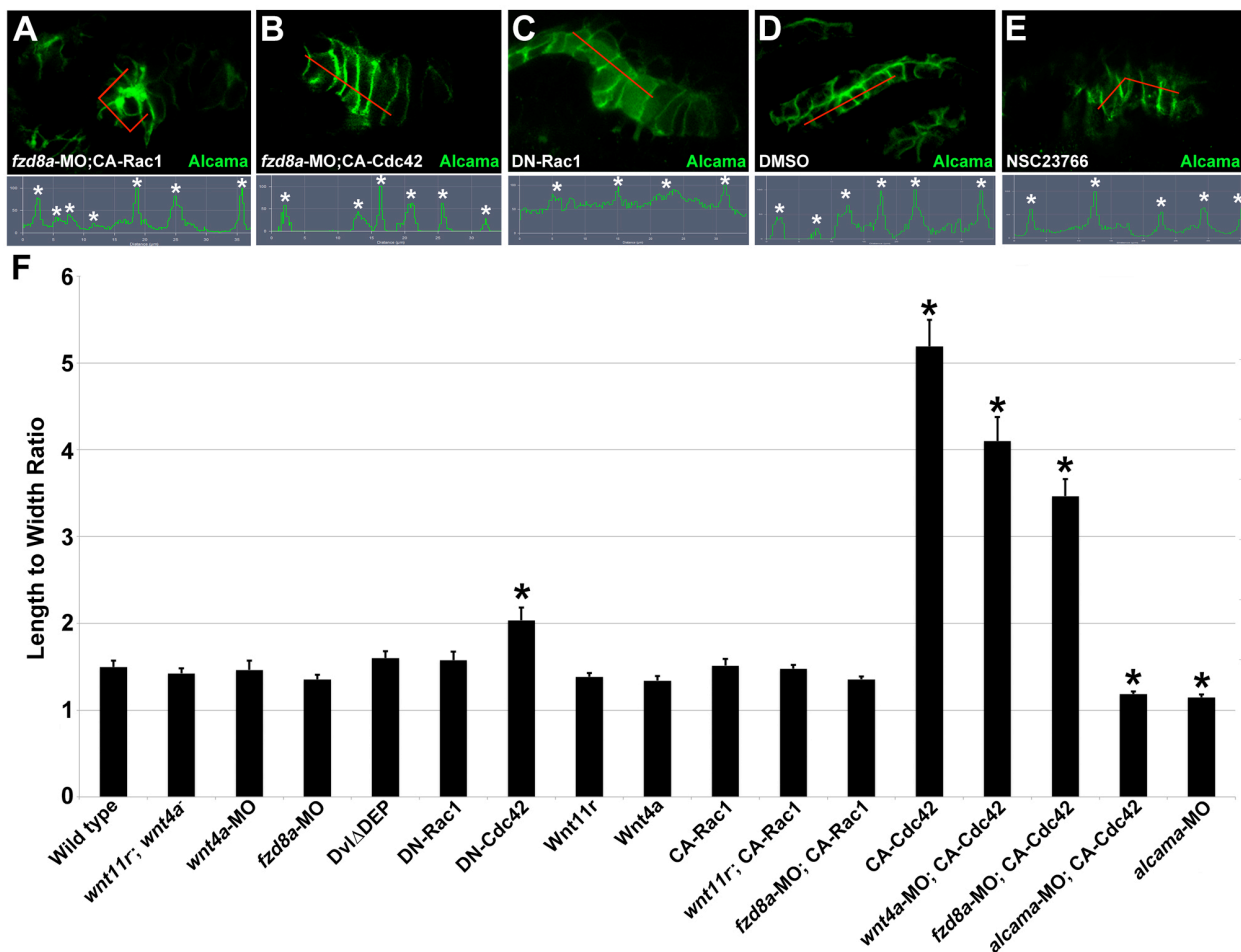

**Figure S3, Alcama localization in rescued *fzd8a*-MO and Rac-inhibited embryos and quantification of cell shape, related to Figure 4.**



(A-E) Immunohistochemistry shows Alcama localization in 34 hpf pouch-forming endoderm in *fzd8a*-MO-injected *nkx2.3:Gal4VP16*; UAS:CA-Rac1 embryos (A), *fzd8a*-MO-injected *nkx2.3:Gal4VP16*; UAS:CA-Cdc42 embryos (B), *nkx2.3:Gal4VP16*; UAS:DN-Rac1 embryos (C), control embryos incubated in 6% DMSO from 18-26 hpf (D), and embryos incubated in the Rac inhibitor NSC23766 in 6% DMSO from 18-26 hpf (E). The normalized intensity of fluorescent signal is plotted along the 35  $\mu$ M red lines. Asterisks indicate identifiable cell-cell boundaries. Activated Rac1 resulted in rosette-like structures in 59/81 *fzd8a*-MO-injected embryos, and activated Cdc42 rescued Alcama membrane localization and induced hyper-elongated cell shape in 24/63 *fzd8a*-MO-injected embryos.

(F) Quantification of 34 hpf pouch cell shape in wild type, mutants, *fzd8a*-MO, and embryos doubly transgenic for UAS transgenes (capitalized) and *nkx2.3:Gal4VP16*. The ratios of the longest versus shortest cell axes are plotted. Asterisks indicate significant differences compared to wild type ( $p < 0.05$  in a student's t-test). Data represent mean  $\pm$  SEM. Total cells analyzed: Wild type (96), *wnt11r*; *wnt4a*<sup>-</sup> (100), *fzd8a*-MO (97), *nkx2.3:Gal4VP16*; UAS:Dvl $\Delta$ DEP (100), *nkx2.3:Gal4VP16*; UAS:DN-Rac1 (96), *nkx2.3:Gal4VP16*; UAS:DN-Cdc42 (92), *nkx2.3:Gal4VP16*; UAS:Wnt11r (45), *nkx2.3:Gal4VP16*; UAS:Wnt4a (100), *nkx2.3:Gal4VP16*; UAS:CA-Rac1 (92), *fzd8a*-MO; *nkx2.3:Gal4VP16*; UAS:CA-Rac1 (81), *wnt11r*; *nkx2.3:Gal4VP16*; UAS:CA-Rac1 (48), *nkx2.3:Gal4VP16*; UAS:CA-Cdc42 (88), *wnt4a*-MO; *nkx2.3:Gal4VP16*; UAS:CA-Cdc42 (53), *fzd8a*-MO; *nkx2.3:Gal4VP16*; UAS:CA-Cdc42 (57), *alcama*-MO; *nkx2.3:Gal4VP16*; UAS:CA-Cdc42 (60), and *alcama*-MO (95).

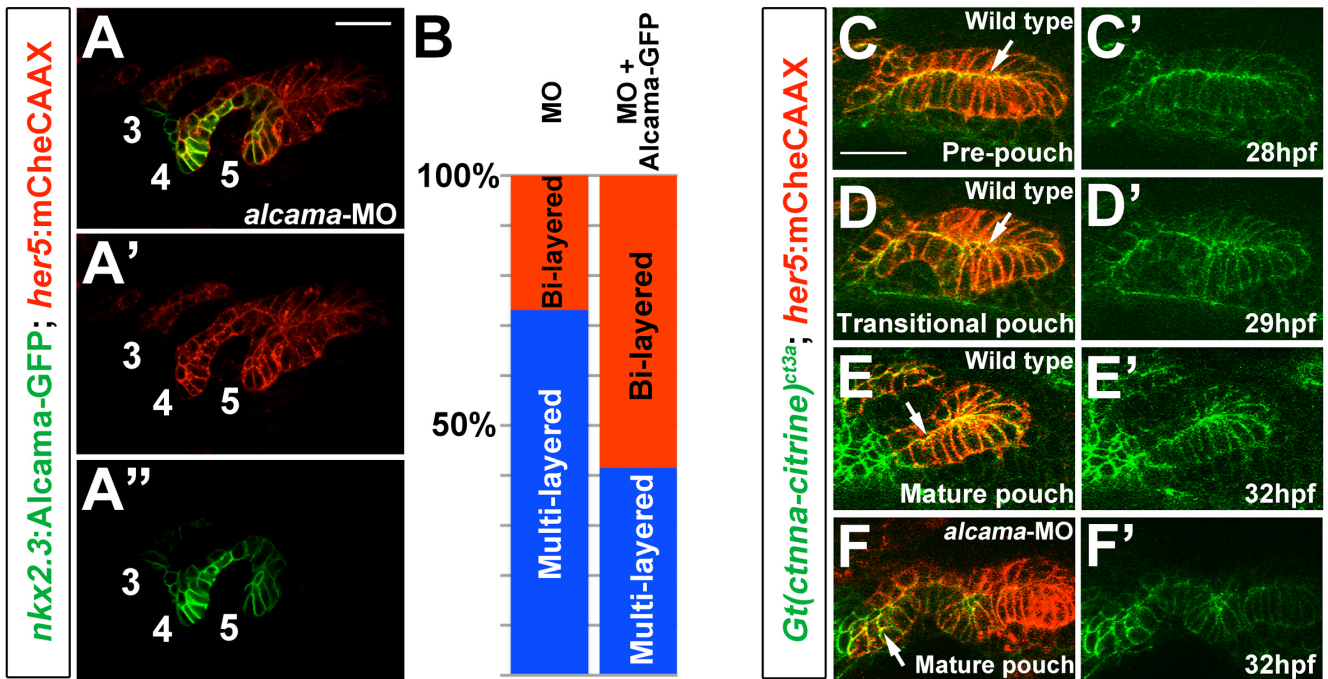

**Figure S4, Requirement of Alcama in endoderm and its role in  $\alpha$ -catenin localization, related to Figure 5.**

(A) Transgenic expression of Alcama-GFP in *nkx2.3:Alcama-GFP; her5:mCherryCAAX* embryos partially restores bilayered pouch morphology to *alcama-MO*-injected embryos. Alcama-GFP (green) localizes to apical and lateral membranes of pouches labeled with *her5:mCherryCAAX* (red). Pouches 3-5 are numbered. Scale bar = 20  $\mu$ M.

(B) Quantification of rescue of *alcama-MO* pouch defects by Alcama-GFP transgenic expression. Pouches 4 and 5 were used for the analysis.  $n=119$  for *alcama-MO* + Alcama-GFP, and  $n=118$  for *alcama-MO* alone.  $p$ -value = 0.000001.

(C-E) Still images from a time-lapse confocal recording of fifth pouch development in a *Gt(ctnna-citrine)<sup>ct3a</sup>; her5:mCherryCAAX* embryo (See Movie S7). In the pre-pouch endoderm,  $\alpha$ -catenin-citrine (green) is enriched along apical membranes (arrows) of the *her5:mCherryCAAX*-labeled endodermal bilayer (red). During pouch initiation,  $\alpha$ -catenin-

citrine becomes less organized in the multi-layered transitional epithelium. As pouches mature,  $\alpha$ -catenin-citrine becomes organized again along apical membranes in the bilayer.

(F) At a stage when wild-type pouches would have matured into bilayers,  $\alpha$ -catenin-citrine remains disorganized in the *alcama*-MO multilayered pouches (arrow).

## SUPPLEMENTAL EXPERIMENTAL PROCEDURES

### Transgenic zebrafish lines

*Gt(ctnna-citrine)<sup>ct3a</sup>* was isolated in a FlipTrap screen as described (Trinh et al., 2011).

Upstream regulatory regions of the *hairy-related 5 (her5)*, *NK2 transcription factor related 3 (nkx2.3)*, or *NK2 transcription factor related 5 (nkx2.5)* genes were amplified from multi-stage zebrafish genomic DNA by using the Expand Long Range dNTPack (Roche Applied Science).

The PCR products (0.7 kb from *her5*; 5.5 kb from *nkx2.3*; and 5.9 kb from *nkx2.5*) were

cloned into the pDONR P4-P1R vector to generate p5E-*her5*, p5E-*nkx2.5*, and p5E-*nkx2.3*.

p5E-*her5* was combined with pME-mCherryCAAX, p3E-polyA, and pDestTol2pA2 to

generate the *her5:mCherryCAAX:pA* construct. A total of five independent transgenic lines of

*Tg(her5:mCherryCAAX)* were isolated based on mCherryCAAX expression in pharyngeal

endoderm (PE), and *Tg(her5:mCherryCAAX)<sup>el72</sup>* showed the brightest mCherryCAAX

expression and was used in this study. p5E-*nkx2.5* was combined with pME-GFP, p3E-polyA,

and pDestTol2pA2 to generate the *nkx2.5:GFP:pA* construct. A total of eight independent

lines of *Tg(nkx2.5:GFP)* were produced based on GFP expression in the mesoderm, and

*Tg(nkx2.5:GFP)<sup>el83</sup>* showed the brightest GFP expression and was used in this study. p5E-

*nkx2.3* was combined with pME-Gal4VP16, p3E-polyA, and pDestTol2CG2 to generate the

*nkx2.3:Gal4VP16:pA* construct. p5E-*nkx2.5* was combined with pME-Gal4VP16, p3E-polyA,

and pDestTol2CG2 to generate the *nkx2.5:Gal4VP16:pA* construct. Five independent lines of *Tg(nkx2.5:Gal4VP16)* and seven of *Tg(nkx2.3:Gal4VP16)* were tested with *Tg(UAS:CFP-NTR)<sup>el53</sup>*, and the strongest alleles - *Tg(nkx2.5:Gal4VP16)<sup>el74</sup>* and *Tg(nkx2.3:Gal4VP16)<sup>el93</sup>* – were used in this study.

A deletion or point mutation was induced by fusion PCR to generate DvlΔDEP, Rac1N17, Rac1V12, Cdc42N17, or Cdc42V12. To generate DvlΔDEP, two cDNA fragments of *dishevelled2 (dvl2)* were amplified separately by PCR (Phusion, NEB) from zebrafish multi-stage cDNA using primers that produce overlapping ends. A second PCR using 'nested' primers fused the fragments into a single fragment with deletion of the DEP domain. The single fragment was cloned into the middle entry pDONR221 vector to generate pME-DvlΔDEP. To induce Rac1 or Cdc42 point mutations, two cDNA fragments of *ras-related C3 botulinum toxin substrate 1 (rac1)* or *cell division cycle 42 (cdc42)* were amplified first by PCR using primers that produce overlapping ends and include the desired point mutation. A second PCR using 'nested' primers fused the fragments into a single fragment, with single fragments cloned into the middle entry pDONR221 vector to generate pME-Rac1N17, pME-Rac1V12, pME-Cdc42N17, or pME-Cdc42V12. Each of the middle entry vectors was combined with p5E-UAS, p3E-polyA, and pDestTol2AB to generate UAS:DvlΔDEP:pA, UAS:Rac1N17:pA, UAS:Rac1V12:pA, UAS:Cdc42N17:pA, and UAS:Cdc42V12:pA constructs. Five each of *Tg(UAS:DvlΔDEP:pA)*, *Tg(UAS:Rac1N17:pA)*, *Tg(UAS:Cdc42N17:pA)*, and *Tg(UAS:Cdc42V12:pA)*; and three *Tg(UAS:Rac1V12:pA)* independent transgenic lines were isolated based on *α-crystallin: Cerulean* which produces blue fluorescence in the lens. For phenotypic analyses, UAS transgenic lines were crossed with *Tg(nkx2.3:Gal4VP16)<sup>el93</sup>* and animals carrying both *cmcl2:GFP* and *α-crystallin: Cerulean* were analyzed, with *cmcl2:GFP*-only embryos serving as internal controls. Each allele within

a UAS line showed similar phenotypes in both pouch and CB development. We used *Tg(UAS:DvlΔDEP)<sup>el190</sup>*, *Tg(UAS:RacN17)<sup>el262</sup>*, *Tg(UAS:RacV12)<sup>el320</sup>*, *Tg(UAS:Cdc42N17)<sup>el268</sup>*, and *Tg(UAS:Cdc42V12)<sup>el322</sup>* for further analysis as they displayed the highest penetrance and severity of pouch and CB defects in conjunction with *Tg(nkx2.3:Gal4VP16)<sup>el93</sup>*.

To generate the *nkx2.3:GFP-Dvl:pA* construct, the coding sequence of Dvl2 was amplified from multi-stage zebrafish cDNA by PCR and then cloned into the 3' entry pDONR P2R-P3 vector to generate p3E-Dvl. The p3E-Dvl was combined with p5E-*nkx2.3*, pME-GFP, and pDestTol2CG2. A total of three independent lines of *Tg(nkx2.3:GFP-Dvl)* were established based on GFP expression in PE, and *Tg(nkx2.3:GFP-Dvl)<sup>el303</sup>* showed the brightest GFP expression and was used in this study. The coding sequence of Alcama without the stop codon was amplified from multi-stage zebrafish cDNA by PCR and cloned into the middle entry pDONR221 vector to generate pME-Alcama. pME-Alcama was combined with p5E-*nkx2.3*, p3E-GFP, and pDestTol2CG2. A total of four independent lines of *Tg(nkx2.3:Alcama-GFP)* were isolated based on GFP expression in PE, and *Tg(nkx2.3:Alcama-GFP)<sup>el304</sup>* showed the brightest GFP expression and was used in this study. To generate the UAS:Wnt11r construct, the full length sequence of Wnt11r was amplified from multi-stage zebrafish cDNA by PCR and cloned into pDONR221 to generate pME-Wnt11r. pME-Wnt11r was combined with p5E-UAS, p3E-pA, and pDestTol2AB. Three independent lines of *Tg(UAS:Wnt11r)* were isolated based on *α-crystallin: Cerulean*. The three lines showed a similar range of pouch and CB defects in conjunction with *Tg(nkx2.3:Gal4VP16)<sup>el93</sup>* and *Tg(UAS:Wnt11r)<sup>el421</sup>* was used in this study. To generate the UAS:Wnt4a construct, the coding sequence of Wnt4a was amplified from multi-stage zebrafish cDNA by PCR and cloned into pDONR221 to generate pME-Wnt4a. pME-Wnt4a was combined with p5E-UAS, p3E-pA, and pDestTol2CG2. Two independent lines of



*Tg(UAS:Wnt4a)* were isolated based on *cmhc2:GFP*. The two lines showed a similar range of pouch and CB defects in conjunction with *Tg(nkx2.3:Gal4VP16)<sup>el93</sup>* and *Tg(UAS:Wnt4a)<sup>el48</sup>* was used in this study. To generate the UAS:CFP-NTR construct, the coding sequence of CFP-NTR was amplified from the *tol2\_CFP\_NTR* plasmid (Curado et al., 2008) by PCR and cloned into pDONR221 to generate pME-CFP-NTR. pME-CFP-NTR was combined with p5E-UAS, p3E-pA, and pDestTol2CG2. Four independent lines of *Tg(UAS:CFP-NTR:pA)* were isolated based on *cmhc2:GFP*, and *Tg(UAS:CFP-NTR:pA)<sup>el53</sup>* was used in this study.

The following primers were used to generate constructs:

*her5-B4F*: 5'-GGGGACAACCTTTGTATAGAAAAGTTGACTGCAGAAACACCATTGGA-3'

*her5-B1R*: 5'-GGGGACTGCTTTTTTTGTACAAACTTGGCGGCCGCCATGCAGCTCTA-3'

*nkx2.5-B4F*: 5'-GGGGACAACCTTTGTATAGAAAAGTTGCCCAAGCCCACTTACCAATA-3'

*nkx2.5-B1R*: 5'-GGGGACTGCTTTTTTTGTACAAACTTGGGATAATCCGGTTGGGATTT-3'

*nkx2.3-B4F*: 5'-GGGGACAACCTTTGTATAGAAAAGTTGAGGGCATAGCTAATGGGGA-3'

*nkx2.3-B1R*: 5'-GGGGACTGCTTTTTTTGTACAAACTTGGGCGCTGTTGGATTACATCT-3'

*Dvl-B1F*: 5'-GGGGACAAGTTTGTACAAAAAAGCAGGCTAGCGTTAGCAGGATAAGTTAG-3'

*Dvl-MR*: 5'-GATTGTGCTGCTAGGCTCAATACG-3'

*Dvl-MF*: 5'-CGTATTGAGCCTAGCAGCACAATC-3'

*Dvl-B2R*: 5'-GGGGACCACTTTGTACAAGAAAGCTGGGTGTTATTTAGAAGGCCAGACC-3'

*Rac1-B1F*: 5'-GGGGACAAGTTTGTACAAAAAAGCAGGCTTGGCTGTTTGTTTAACTGG-3'

*Rac1(N17)-MR*: 5'-AGAAGGCAATTTTTTCCC-3'

*Rac1(N17)-MF*: 5'-GGGAAAAAATTGCCTTCT-3'

*Rac1(V12)-MR*: 5'-ACAGCCACGTCCCC-3'

*Rac1(V12)-MF*: 5'-GGGGACGTGGCTGT-3'

*Rac1-B2R*: 5'-GGGGACCACTTTGTACAAGAAAGCTGGGTGGAGACAGTAAAAGCATGA-

3'

Cdc42-B1F: 5'-GGGGACAAGTTTGTACAAAAAAGCAGGCTCTTGAATGAGAGCAGTGGA-3'

Cdc42(N17)-MR: 5'-TTAATAGACAGTTTTTACCCACT-3'

Cdc42(N17)-MF: 5'-AGTGGGTAAAAACTGTCTATTAA-3'

Cdc42(V12)-MR: 5'-CCACTGCAACATCACCA-3'

Cdc42(V12)-MF: 5'-TGGTGATGtTGCAGTGG-3'

Cdc42-B2R: 5'-GGGGACCACTTTGTACAAGAAAGCTGGGTCAGAGCATTTGGTGTTC-3'

Dvl-B2F: 5'-GGGGACAGCTTTCTTGTACAAAGTGGTTATGGCGGAGACCAAGA-3'

Dvl-B3R: 5'-GGGGACAACCTTTGTATAATAAAGTTGTTACATCACATCCACAAAAAAC-3'

Alcam-B1F: 5'-GGGGACAAGTTTGTACAAAAAAGCAGGCTATGCATTGGTTATCTGC-3'

Alcam-B2R: 5'-  
GGGGACCACTTTGTACAAGAAAGCTGGGTGACATCTGCTTTATGATTGTTC-3'

Wnt11r-B1F: 5'- GGGGACAAGTTTGTACAAAAAAGCAGGCTGAGCAGCACCACAAACC-3'

Wnt11r-B2R: 5'- GGGGACCACTTTGTACAAGAAAGCTGGGTTTACGCTCCACACCCAG-3'

Wnt4a-B1F: 5'-GGGGACAAGTTTGTACAAAAAAGCAGGCTATGCCAACAGTCTCCTC-3'

Wnt4a-B2R: 5'-GGGGACCACTTTGTACAAGAAAGCTGGGTTTATTCTCGGCAGGTGTG-3'

CFP-NTR-B1F: 5'-  
GGGGACAAGTTTGTACAAAAAAGCAGGCTATGGTGAGCAAGGGCGAGGA-3'

CFP-NTR-B2R: 5'-  
GGGGACCACTTTGTACAAGAAAGCTGGGTATGGTGAGCAAGGGCGAGGA-3'

### **Whole-mount in situ hybridization**

Published probes include *sox10* and *dlx2a* (Das and Crump, 2012) and *dlx3b* (Zuniga et al., 2011). PCR amplification generated DNA fragments from the *nkx2.5* (668 bp), *wnt11r* (612 bp), *wnt4a* (604 bp), or *fzd8a* (634 bp) genes. PCR products were cloned into pGEM®-T

Easy Vector Systems (Promega). T7 or SP6 RNA polymerase was used to synthesize riboprobes from linearized plasmids for whole-mount in situ hybridization. The following primers were used:

*nkx2.5*-r-F: 5'-CATCCGGATCCTCTCTCT-3'

*nkx2.5*-r-R: 5'-GCTGTTGGACTGTGAAGG-3'

*wnt11r*-r-F: 5'-AGACCTGGAACGAGGAAC-3'

*wnt11r*-r-R: 5'-CCGCTGGATGTCTTATTG-3'

*wnt4a*-r-F: 5'-GGGAAAGTGGTCACACAA-3'

*wnt4a*-r-R: 5'-GTCTTGTTGCAGAATCGG-3'

*fzd8a*-r-F: 5'-GCTACCTGTTGGGGATTT-3'

*fzd8a*-r-R: 5'-TTAACGCGGTTGTAGAGC-3'

### **Confirmation of the efficiency of *wnt4a*-MO**

The efficiency of *wnt4a*-MO was analyzed by RT-PCR using the following primers spanning the second intron of the *wnt4a* gene.

*wnt4a*-E2F: 5'-GTGGGGAGCATCTCTGAT-3'

*wnt4a*-E3R: 5'-TCCGTGAACATTACGGTC-3'

### **SUPPLEMENTAL REFERENCES**

Das, A., and Crump, J.G. (2012). *Bmps* and *id2a* act upstream of *Twist1* to restrict ectomesenchyme potential of the cranial neural crest. *PLoS Genet* 8, e1002710.

Trinh, L.A., Hochgreb, T., Graham, M., Wu, D., Ruf-Zamojski, F., Jayasena, C.S., Saxena, A., Hawk, R., Gonzalez-Serricchio, A., Dixon, A., *et al.* (2011). A versatile gene trap to visualize and interrogate the function of the vertebrate proteome. *Genes Dev* 25, 2306-2320.
